# Supplementary material for: Cork Oak Young and Traumatic Periderms Show PCD Typical Chromatin Patterns but Different Chromatin-Modifying Genes Expression
Source: PubMed Central journal article supplement (PMC6120546; doi:10.3389/fpls.2018.01194), 2018-08-27

**Supplementary Figure 2.** Diagram of the three *Qs*HMTs structure. (A) *QsSUVH4* with four domains found in SUVH4 proteins: SRA-YDG, Pre-SET, SET, and post-SET from N to C terminal; (B) *QsATXR3* lacks the N-terminal, but with the SET domain of ATXR3 proteins detected at the C terminal; (C) *QsATX3* with the domains described for ATX3 proteins: PWWP, plant homeodomains (PHD) finger, SET, and post-SET from N to C terminal.

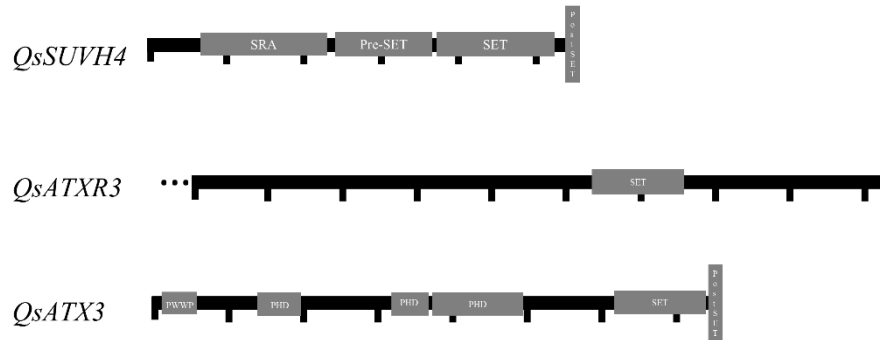

Supplement: Image_2.pdf [file Image_2.pdf]
