# Supplementary material for: Cork Oak Young and Traumatic Periderms Show PCD Typical Chromatin Patterns but Different Chromatin-Modifying Genes Expression
Source: PubMed Central journal article supplement (PMC6120546; doi:10.3389/fpls.2018.01194), 2018-08-27
Supplement: Table_1.pdf [file Table_1.pdf]

**Supplementary Table 1.** Histone methyltransferase sequences used to perform the phylogenetic analysis. For each sequence the name used in this work, the species and the accession number from NCBI (<https://www.ncbi.nlm.nih.gov/>) are provided.

| <b>Class</b> | <b>Sequence name</b> | <b>Species</b>              | <b>Locus</b>                     |
|--------------|----------------------|-----------------------------|----------------------------------|
| ATXR3        | AtATXR3              | <i>Arabidopsis thaliana</i> | NP_193253                        |
|              | BrATXR3              | <i>Brassica rapa</i>        | XP_009144717                     |
|              | EgATXR3              | <i>Eucalyptus grandis</i>   | XP_010051270                     |
|              | GmATXR3              | <i>Glycine_max</i>          | XP_006592400                     |
|              | JrATXR3              | <i>Juglans regia</i>        | XP_018846411                     |
|              | PaATXR3              | <i>Prunus avium</i>         | XP_021811206                     |
|              | PpATXR3              | <i>Prunus persica</i>       | XP_020416287                     |
|              | PtATXR3              | <i>Populus_trichocarpa</i>  | XP_006372997                     |
|              | QsATXR3              | <i>Quercus suber</i>        | QS126154.0 (sequence in study)   |
|              | VvATXR3              | <i>Vitis vinifera</i>       | XP_010657340                     |
| ATX3         | AtATX3               | <i>Arabidopsis thaliana</i> | NP_001078326                     |
|              | BrATX3               | <i>Brassica rapa</i>        | XP_009104342                     |
|              | CsATX3               | <i>Cucumis_sativus</i>      | XP_011656748                     |
|              | EgATX3               | <i>Eucalyptus grandis</i>   | XP_018728259                     |
|              | GmATX3               | <i>Glycine_max</i>          | XP_006583237                     |
|              | JrATX3               | <i>Juglans regia</i>        | XP_018846721                     |
|              | PaATX3               | <i>Prunus avium</i>         | XP_021815266                     |
|              | PpATX3               | <i>Prunus persica</i>       | XP_020411934                     |
|              | PtATX3               | <i>Populus_trichocarpa</i>  | PNT50159.1                       |
|              | QsATX3               | <i>Quercus suber</i>        | XP_023876913 (sequence in study) |
| SUVH4        | AtSUVH4              | <i>Arabidopsis thaliana</i> | NP_196900.1                      |
|              | BrSUVH4              | <i>Brassica rapa</i>        | XP_009131370                     |
|              | CsSUVH4              | <i>Cucumis_sativus</i>      | XP_011651591                     |
|              | EgSUVH4              | <i>Eucalyptus grandis</i>   | XP_010068638                     |
|              | GmSUVH4              | <i>Glycine_max</i>          | XP_006604199                     |
|              | JrSUVH4              | <i>Juglans regia</i>        | XP_018834874                     |
|              | PaSUVH4              | <i>Prunus avium</i>         | XP_021823630                     |
|              | PpSUVH4              | <i>Prunus persica</i>       | XP_020417219                     |
|              | PtSUVH4              | <i>Populus_trichocarpa</i>  | XP_021823630                     |
|              | QsSUVH4              | <i>Quercus suber</i>        | XP_023924619 (sequence in study) |
|              | VvSUVH4              | <i>Vitis vinifera</i>       | XP_010660678                     |
