# Supplementary material for: Cork Oak Young and Traumatic Periderms Show PCD Typical Chromatin Patterns but Different Chromatin-Modifying Genes Expression
Source: PubMed Central journal article supplement (PMC6120546; doi:10.3389/fpls.2018.01194), 2018-08-27
Supplement: Table_2.pdf [file Table_2.pdf]

**Supplementary Table 2 – Description of the target genes with respective nucleotide and protein accession numbers, primer sequences and amplicon size.**

| <b>Target gene</b>                                           | <b>NCBI nucleotide/<br/>protein accession<br/>number</b>                  | <b>Primer sequence(forward/reverse)</b>         | <b>Amplicon length (bp)</b> |
|--------------------------------------------------------------|---------------------------------------------------------------------------|-------------------------------------------------|-----------------------------|
| <i>QsCMT3</i> - Chromomethyltransferase 3                    | XM_024063870/<br>XP_023919638.1                                           | AATGATTATCCTCTACCTGCTT/<br>TCATAACTCCCGACCCAAAA | 224                         |
| <i>QsDRM2</i> - Domain rearranged methyltransferase 2        | XP_023884319.1/<br>XM_024028551                                           | TCGCTAATGAAGGCGGGTGT/<br>GTGTAGGGTTGGCAAGGAGG   | 191                         |
| <i>QsMET1</i> - DNA Methyltransferase 1                      | XP_023871673.1/<br>XM_024015905                                           | ACAAGGAGGTCCACCACATA/<br>AGGTTTCGTTGGAAAGGCTAC  | 164                         |
| <i>QsMET2</i> - DNA Methyltransferase 2                      | XP_023891955.1/<br>XM_024036187                                           | TCCCTTTGAAGAATGTTG/<br>GATGCCTGTTGCTACCTG       | 224 (Ramos et al.,<br>2013) |
| <i>QsSWC4</i> - SWR1-complex protein 4                       | XP_023927278.1/<br>XM_024071510.1                                         | CCTAAGCGTTCAAACCGTGGTG/<br>CTGGGCTGGCGATGATGGAG | 141                         |
| <i>QsSUVH4</i> - H3K9 Histone-lysine N-<br>methyltransferase | XP_023924619/<br>XM_024068851.1                                           | CAACGTCCCTTGGTTCAACT/<br>TGCGATGTTCTACCTGTTGC   | 211                         |
| <i>QsATXR3</i> - Histone-lysine N-methyltransferase          | QS126154.0<br>( <a href="http://corkoakdb.org">http://corkoakdb.org</a> ) | TCACAATTAGGACGGCATGA/<br>ATGGGATTCGATCTTTGCAG   | 172                         |
| <i>QsATX3</i> - Histone-lysine N-methyltransferase           | XP_023876913/<br>XM_024021145.1                                           | GGACAGATATCAGGGGCAGA/<br>GCCGTCACAGGGTCTTGTAT   | 235                         |
